# Supplementary material
Source: publisher figshare collection journal article supplement (https://aacr.figshare.com/ndownloader/files/39812868)
Supplement: Supplementary file 1 [file 39812868]

## SUPPLEMENTARY MATERIALS & METHODS

### siRNA Sequences

All siRNAs were synthesized as long oligos in the following hairpin configuration: forward oligo: 5'-CCGGT-(19 bp. sense)-TTCAAGAGA-(19 bp. anti-sense)-TTTTTG-3'; reverse oligo: 5'-AATTCAAAAA-(19 bp. sense)-TCTCTTGAA-(19 bp. anti-sense)-A-3'. The oligos were annealed and then inserted into the retroviral vector pSIRISP (33), digested with AgeI and EcoRI. The 19 base-pair siRNA sequences or controls used in this study included those targeted against VEGF-C (only core sense sequence shown—C13: 5'-ACTGGATGTTTACAGACAA-3'; C14: 5'-GTTTCATTCCATTATTAGAC-3'; C14-MM: 5'-GTTTCATTCCACCCATTAGAC-3') and those targeted against VEGF-A (A2: 5'-GTGAATGCAGACCAAAGAA-3'; A3: 5'-GGAGTACCCTGATGAGATC-3'; A3-MM: 5'-GGAGTACCCACATGAGATC-3').

### Real-time PCR Primer Sequences

The following primer sets were used for real-time PCR analysis: GAPDH (Forward: 5'-GGAAGGTGAAGGTCCGAGTC-3'; Reverse: 5'-CTGGAAGATGGTGATGGGATTTC-3'); human VEGF-C (Forward: 5'-GCCAATCACACTTCCTGCCGA-3'; Reverse: 5'-GTTCGCTGCCTGACACTGTGG-3'); and human VEGF-A (Forward: 5'-CACTGAGGAGTCCAACATCAC-3'; Reverse: 5'-TTCTTGTCTTGCTCTATCTTTCTTTG-3').
